# Supplementary material
Source: PubMed Central journal article supplement (PMC4698966)
Supplement: NIHMS744880-supplement-1.pdf [file NIHMS744880-supplement-1.pdf]

Supplemental Table 1. Electronic search strategy

|                                                                                                                                                                                                                                                                                                                                                                                                                                                                                                                                                                        |
|------------------------------------------------------------------------------------------------------------------------------------------------------------------------------------------------------------------------------------------------------------------------------------------------------------------------------------------------------------------------------------------------------------------------------------------------------------------------------------------------------------------------------------------------------------------------|
| <b>PubMed</b>                                                                                                                                                                                                                                                                                                                                                                                                                                                                                                                                                          |
| ((("breast neoplasms"[mh] OR "breast cancer"[tiab] OR (breast[tiab] AND neoplasm[tiab])) AND ((gene expression[tiab] AND profiling[tiab]) OR "gene expression profiling"[mh] OR oncotype[tiab] OR "21 gene"[tiab] OR mammaprint[tiab] OR "70 gene"[tiab] OR "recurrence score"[tiab] NOT (("animals"[MeSH Terms] NOT "humans"[MeSH Terms]) OR review[pt]))) NOT "tumor cells, cultured"[MeSH Terms]) AND (("2007/01/01"[PDAT] : "3000/12/31"[PDAT]) AND English[lang])                                                                                                 |
| <b>EMBASE</b>                                                                                                                                                                                                                                                                                                                                                                                                                                                                                                                                                          |
| 'breast tumor'/exp OR (breast:ti,ab AND cancer:ti,ab) AND ('gene expression profiling'/exp OR ('gene expression':ab,ti AND profiling:ab,ti) OR 'oncotype':ab,ti OR 'mammaprint':ab,ti OR '21 gene':ab,ti OR '70 gene':ab,ti OR 'recurrence score':ab,ti) NOT ('human tissue, cells or cell components'/exp OR 'cell culture'/exp OR 'validation study'/exp OR apoptosis:ab,ti OR 'cell death':ab,ti OR (transcriptional:ab,ti AND mechanism:ab,ti) OR (transcriptional:ab,ti AND machinery:ab,ti)) AND [english]/lim AND [humans]/lim AND [2007-2013]/py NOT review:it |
| <b>The Cochrane Library (Reviews and CENTRAL)</b>                                                                                                                                                                                                                                                                                                                                                                                                                                                                                                                      |
| ("breast neoplasms" or "breast cancer":ti,ab,kw or (breast AND cancer):ti,ab,kw or (breast AND neoplasm):ti,ab,kw) AND ("gene expression profiling" or "gene expression" or "gene expression" AND profiling:ti,ab,kw or "gene expression" AND (test OR tesing):ab)<br>LIMITS: from 2007                                                                                                                                                                                                                                                                                |
| <b>CINAHL</b>                                                                                                                                                                                                                                                                                                                                                                                                                                                                                                                                                          |
| ((MH "breast neoplasms" or TX "breast cancer" ) OR TX ( Breast AND cancer ) or TX ( breast AND neoplasm ))) AND (TX "gene expression profiling" or TX ( "gene expression" AND profiling) AND TX (oncotpye or mammaprint)) LIMITS 2007 to 2013                                                                                                                                                                                                                                                                                                                          |
