# Supplementary material
Source: PubMed Central journal article supplement (PMC4698966)
Supplement: NIHMS744880-supplement-3.pdf [file NIHMS744880-supplement-3.pdf]

Supplemental Table 3. Overlap in primary studies included in systematic reviews

| Study ID                              | Smartt 2009 <sup>14</sup> | OHTAC 2010 <sup>15</sup> | Ward 2011 <sup>16</sup> | Hornberger 2012 <sup>17</sup> | Rouzier 2013 <sup>18</sup> |
|---------------------------------------|---------------------------|--------------------------|-------------------------|-------------------------------|----------------------------|
| Akashi-Tanaka 2009 <sup>20</sup>      | O1                        |                          |                         |                               |                            |
| Kok 2009 <sup>21</sup>                | O1                        |                          |                         |                               |                            |
| Li 2009 <sup>22</sup>                 | O1                        |                          |                         |                               |                            |
| Paik 2006 <sup>23*</sup>              |                           | O1                       |                         | O1                            |                            |
| Albain 2010 <sup>24**</sup>           |                           | O1                       | O1                      | O1                            |                            |
| Tang 2011 <sup>25*</sup>              |                           |                          | O1                      | O1                            |                            |
| Tang 2010 <sup>26</sup>               |                           |                          | O1                      |                               |                            |
| Asad 2008 <sup>27**</sup>             | O2                        | O2                       |                         | O2                            |                            |
| Rayhanabad 2008 <sup>28</sup>         |                           |                          |                         | O2                            |                            |
| Henry 2009 <sup>29*</sup>             | O2                        |                          |                         | O2                            |                            |
| Geffen 2009 <sup>30*</sup>            |                           | O2                       | O2                      |                               |                            |
| Lo 2010 <sup>31**</sup>               |                           | O2                       | O2                      | O2                            |                            |
| Ademuyiwa 2011 <sup>32*</sup>         |                           |                          | O2                      | O2                            |                            |
| Holt 2011 <sup>33</sup>               |                           |                          | O2                      |                               |                            |
| Oratz 2007 <sup>34</sup>              |                           |                          |                         | O2                            |                            |
| Klang 2010 <sup>35</sup>              |                           |                          |                         | O2                            | O3                         |
| Hornberger 2011 <sup>36</sup>         |                           |                          |                         | O2                            | O3                         |
| Joh 2011 <sup>37</sup>                |                           |                          |                         | O2                            |                            |
| Partin 2011 <sup>38</sup>             |                           |                          |                         | O2                            |                            |
| Bueno-de-Mesquita 2007 <sup>39*</sup> | M2                        |                          |                         | M2                            |                            |
| Gevenslaben 2010 <sup>40</sup>        |                           |                          | M2                      |                               |                            |
| Hornberger 2005 <sup>41</sup>         |                           |                          |                         |                               | O3                         |
| Lyman 2007 <sup>42</sup>              |                           |                          |                         |                               | O3                         |
| Kondo 2008 <sup>43</sup>              |                           |                          |                         |                               | O3                         |
| Cosler 2009 <sup>44</sup>             |                           |                          |                         |                               | O3                         |
| de Lima Lopes 2010 <sup>45</sup>      |                           |                          |                         |                               | O3                         |
| O'Leary 2010 <sup>46</sup>            |                           |                          |                         |                               | O3                         |
| Tsoi 2010 <sup>47</sup>               |                           |                          |                         |                               | O3                         |
| de Lima Lopes 2011 <sup>48</sup>      |                           |                          |                         |                               | O3                         |
| Holt 2011 <sup>49</sup>               |                           |                          |                         |                               | O3                         |
| Kondo 2011 <sup>50</sup>              |                           |                          |                         |                               | O3                         |
| Hassan 2011 <sup>51</sup>             |                           |                          |                         |                               | O3                         |
| Lacey, Chen 2011 <sup>52</sup>        |                           |                          |                         |                               | O3                         |
| Lacey, Horn 2011 <sup>53</sup>        |                           |                          |                         |                               | O3                         |
| Paulden 2011 <sup>54</sup>            |                           |                          |                         |                               | O3                         |
| Ragaz 2011 <sup>55</sup>              |                           |                          |                         |                               | O3                         |
| Vanderlaan 2011 <sup>56</sup>         |                           |                          |                         |                               | O3                         |
| Hall 2012 <sup>57</sup>               |                           |                          |                         |                               | O3                         |
| Lamond 2012 <sup>58</sup>             |                           |                          |                         |                               | O3                         |
| Madaras 2012 <sup>59</sup>            |                           |                          |                         |                               | O3                         |
| Wilson 2012 <sup>60</sup>             |                           |                          |                         |                               | O3                         |
| Retel 2010 <sup>61</sup>              |                           |                          |                         |                               | M3                         |
| Kondo 2012 <sup>62</sup>              |                           |                          |                         |                               | M3                         |
| Chen 2010 <sup>63</sup>               |                           |                          |                         |                               | M3                         |
| Oestreicher 2005 <sup>64</sup>        |                           |                          |                         |                               | M3                         |
| Zarca 2009 <sup>65</sup>              |                           |                          |                         |                               | M3                         |

O – Oncotype DX; M – MammaPrint; 1,2,3 correspond to each key question; \* - cited by two systematic reviews; \*\* - cited by three systematic reviews.
