# Supplementary material
Source: PubMed Central journal article supplement (PMC4698966)
Supplement: NIHMS744880-supplement-5.pdf [file NIHMS744880-supplement-5.pdf]

Supplemental Table 5. AMSTAR quality assessment of included systematic reviews

|                                                                                                                                                                                                                                                                                                                                                                                                                                                                                                                                         | Smartt 2009 <sup>14</sup>                                                   | OHTAC 2010 <sup>15</sup>                                                    | Ward 2011 <sup>16</sup>                                                                                                    | Hornberger 2012 <sup>17</sup>                                               | Rouzier 2013 <sup>18</sup>                                                                               |
|-----------------------------------------------------------------------------------------------------------------------------------------------------------------------------------------------------------------------------------------------------------------------------------------------------------------------------------------------------------------------------------------------------------------------------------------------------------------------------------------------------------------------------------------|-----------------------------------------------------------------------------|-----------------------------------------------------------------------------|----------------------------------------------------------------------------------------------------------------------------|-----------------------------------------------------------------------------|----------------------------------------------------------------------------------------------------------|
| <p><b>1. Was an ‘a priori’ design provided?</b><br/>The research question and inclusion criteria should be established before the conduct of the review.</p>                                                                                                                                                                                                                                                                                                                                                                            | Yes, reported following criteria used by Marchionni et al [11]              | Unclear – protocol not available or mentioned in published review           | Yes                                                                                                                        | Unclear – protocol not available or mentioned in published review           | Unclear – protocol not available or mentioned in published review                                        |
| <p><b>2. Was there duplicate study selection and data extraction?</b><br/>There should be at least two independent data extractors and a consensus procedure for disagreements should be in place.</p>                                                                                                                                                                                                                                                                                                                                  | Unclear                                                                     | Unclear                                                                     | No – one reviewer screened all titles and abstracts, full-text reports, and extracted data.                                | Yes                                                                         | Unclear                                                                                                  |
| <p><b>3. Was a comprehensive literature search performed?</b><br/>At least two electronic sources should be searched. The report must include years and databases used (e.g. Central, EMBASE, and MEDLINE). Key words and/or MESH terms must be stated and where feasible the search strategy should be provided. All searches should be supplemented by consulting current contents, reviews, textbooks, specialized registers, or experts in the particular field of study, and by reviewing the references in the studies found.</p> | Yes                                                                         | Yes                                                                         | Yes                                                                                                                        | Yes – did not search EMBASE                                                 | Yes – did not search EMABSE                                                                              |
| <p><b>4. Was the status of the publication (i.e. grey literature) used as an inclusion criterion?</b><br/>The authors should state that they searched for reports regardless of their publication type. The authors should state whether or not they excluded any reports (from the systematic review), based on their publication status, language etc.</p>                                                                                                                                                                            | Yes – included conference abstracts if they provided relevant data          | Yes – excluded conference abstracts                                         | Yes – included conference abstracts. Other grey literature were included only “if deemed to provide important information” | Unclear – did not reported including or excluding conference abstracts      | No – include conference abstracts                                                                        |
| <p><b>5. Was a list of studies (included and excluded) provided?</b><br/>A list of included and excluded studies should be provided.</p>                                                                                                                                                                                                                                                                                                                                                                                                | No – included studies only, did not provide description of excluded studies | No – included studies only, did not provide description of excluded studies | Yes                                                                                                                        | No – included studies only, did not provide description of excluded studies | Yes – provided complete description of included studies, and numbers of and reasons for excluded studies |

|                                                                                                                                                                                                                                                                                                                                                                                                                                                         |                                                              |                                                              |                                                             |                                                              |                                                                                    |
|---------------------------------------------------------------------------------------------------------------------------------------------------------------------------------------------------------------------------------------------------------------------------------------------------------------------------------------------------------------------------------------------------------------------------------------------------------|--------------------------------------------------------------|--------------------------------------------------------------|-------------------------------------------------------------|--------------------------------------------------------------|------------------------------------------------------------------------------------|
| <p><b>6. Were the characteristics of the included studies provided?</b><br/>In an aggregated form such as a table, data from the original studies should be provided on the participants, interventions and outcomes. The ranges of characteristics in all the studies analyzed e.g. age, race, sex, relevant socioeconomic data, disease status, duration, severity, or other diseases should be reported.</p>                                         | Yes                                                          | Yes                                                          | Yes                                                         | Yes                                                          | Yes                                                                                |
| <p><b>7. Was the scientific quality of the included studies assessed and documented?</b><br/>'A priori' methods of assessment should be provided (e.g., for effectiveness studies if the author(s) chose to include only randomized, double-blind, placebo controlled studies, or allocation concealment as inclusion criteria); for other types of studies alternative items will be relevant.</p>                                                     | Yes                                                          | Unclear – did not report individual study quality            | Yes                                                         | Yes, but not for studies evaluating cost-effectiveness       | Yes                                                                                |
| <p><b>8. Was the scientific quality of the included studies used appropriately in formulating conclusions?</b><br/>The results of the methodological rigor and scientific quality should be considered in the analysis and the conclusions of the review, and explicitly stated in formulating the recommendations.</p>                                                                                                                                 | Yes                                                          | Yes                                                          | Yes                                                         | Yes                                                          | Yes                                                                                |
| <p><b>9. Were the methods used to combine the findings of studies appropriate?</b><br/>For the pooled results, a test should be done to ensure the studies were combinable, to assess their homogeneity (i.e. Chi-squared test for homogeneity, <math>I^2</math>). If heterogeneity exists a random effects model should be used an/or the clinical appropriateness of combing should be taken into consideration (i.e. is it sensible to combine?)</p> | Yes - studies were not pooled and no meta-analysis performed | Yes - studies were not pooled and no meta-analysis performed | Yes – meta-analysis was not considered due to heterogeneity | Yes - studies were not pooled and no meta-analysis performed | Yes - studies were not pooled and no meta-analysis performed                       |
| <p><b>10. Was the likelihood of publication bias assessed?</b><br/>An assessment of publication bias should include a combination of graphical aids (e.g., funnel plot, other available tests) and/or statistical tests (e.g., Egger regression test).</p>                                                                                                                                                                                              | No                                                           | No                                                           | No                                                          | No                                                           | Unclear – not reported                                                             |
| <p><b>11. Was the conflict of interest stated?</b><br/>Potential sources of support should be clearly acknowledged in both the systematic review and the included studies.</p>                                                                                                                                                                                                                                                                          | Unclear – review author's COI not reported                   | Yes – no COI declared                                        | Yes – no COI declared                                       | Yes – study funded by Genomics Health, Inc                   | Yes – two authors received funding from Genomics Health Inc for their work on this |

|  |  |  |  |  |                                                                         |
|--|--|--|--|--|-------------------------------------------------------------------------|
|  |  |  |  |  | study; 2 other authors received prior funding from Genomics Health Inc. |
|--|--|--|--|--|-------------------------------------------------------------------------|
